# Supplementary material for: Design, Synthesis, and Use of Peptides Derived from Human Papillomavirus L1 Protein for the Modification of Gold Electrode Surfaces by Self-Assembled Monolayers
Source: MDPI journal article supplement (doi:10.3390/molecules22111970), 2017-11-14
Supplement: s1 [file s1]

# Design, Synthesis, and Use of Peptides Derived from Human Papillomavirus L1 Protein for the Modification of Gold Electrode Surfaces by Self-Assembled Monolayers

John Alejandro Lara Carrillo<sup>1</sup>, Ricardo Fierro Medina<sup>2</sup>, Juan Manríquez Rocha<sup>3</sup>, Erika Bustos Bustos<sup>3</sup>, Diego Sebastián Insuasty Cepeda<sup>2</sup>, Javier Eduardo García Castañeda<sup>1</sup>, Zuly Jenny Rivera Monroy<sup>2\*</sup>

Correspondence: zjriveram@unal.edu.co; Tel.: +57-1-3165000 (ext. 14436)

## Table of contents

**Table S1.** FT-IR detailed band assignment for Au electrodes modified with **HPV-4** and **HPV-5**.

**Figure S1.** Characterization of synthetic peptides derived from L1-HPV.

**Figure S2.** Cyclic voltammogram of the bare gold electrode

**Figure S3.** Effect of pH on current density.

**Calculation of Surface Roughness**

**Analytical Methods**

**Table S1.** FT-IR detailed band assignment for Au electrodes modified with **HPV-4** and **HPV-5**.

| Assignment                                                         | Self-assembled Peptide |           |
|--------------------------------------------------------------------|------------------------|-----------|
|                                                                    | HPV-4                  | HPV-5     |
| Amide A-B $\nu(\text{N-H})$                                        | 3392-3347              | 3392-3265 |
| Amide I $\nu(\text{C=O})$                                          | 1648                   | 1646      |
| Amide II $\delta(\text{N-H})$ , $\nu(\text{N-C=O})_{\text{sy}}$    | 1540                   | 1539      |
| Amide III $\nu(\text{C-N})$ , $\delta(\text{N-H})$                 | 1244                   | 1232      |
| $\delta(\text{NH}_3^+)_{\text{asy}}$                               | 2043                   | 2222-2134 |
| $\nu(\text{C-H})$ , alkyl chain ( $\text{C-H}$ , $-\text{CH}_2-$ ) | 2922-2832              | 2822      |
| Tyrosine $\nu(\text{O-H})$                                         | -----                  | 3732-3680 |
| Tyrosine $\tau(\text{O-H})$                                        | -----                  | 635       |
| Tyrosine benzene ring vibrations                                   | -----                  | 1614      |
| Threonine $\nu(\text{O-H})$                                        | 3606                   | -----     |
| Histidine $\nu(\text{N-H})_{\text{heterocycle}}$                   | 3272                   | -----     |
| Asparagine $\nu(\text{C=O})$                                       | 1604                   | -----     |
| Glutamic acid $\nu(\text{COO}^-)_{\text{SIM}}$                     | 1442                   | -----     |
| Isoleucine $\delta(\text{CH}_3)_{\text{SIM}}$                      | 1373                   | -----     |
| Isoleucine $\omega$ or $\tau(\text{CH}_3)$                         | -----                  | 1323      |
| Serine $\delta(\text{O-H})$                                        | 1244                   | -----     |
| Lysine $\rho(\text{NH}_3^+)$                                       | 1155                   | 1116      |
| Lysine $\tau(\text{NH}_3^+)$                                       | 521                    | 500       |

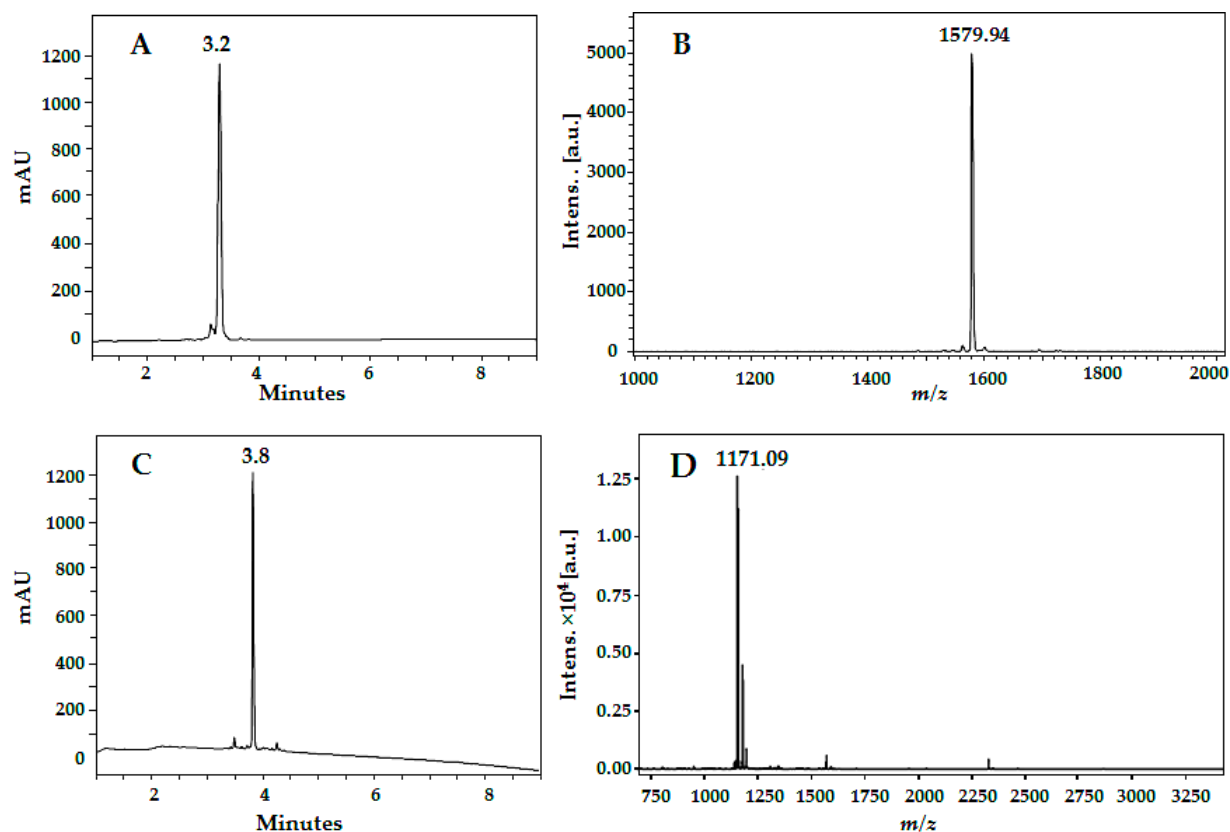**Figure S1.** Characterization of synthetic peptides derived from L1-HPV. Peptide **HPV-4**: (A) RP-HPLC profile, (B) MALDI-TOF spectrum. Dimeric peptide **HPV-5**: (C) RP-HPLC profile, (D) MALDI-TOF spectrum.

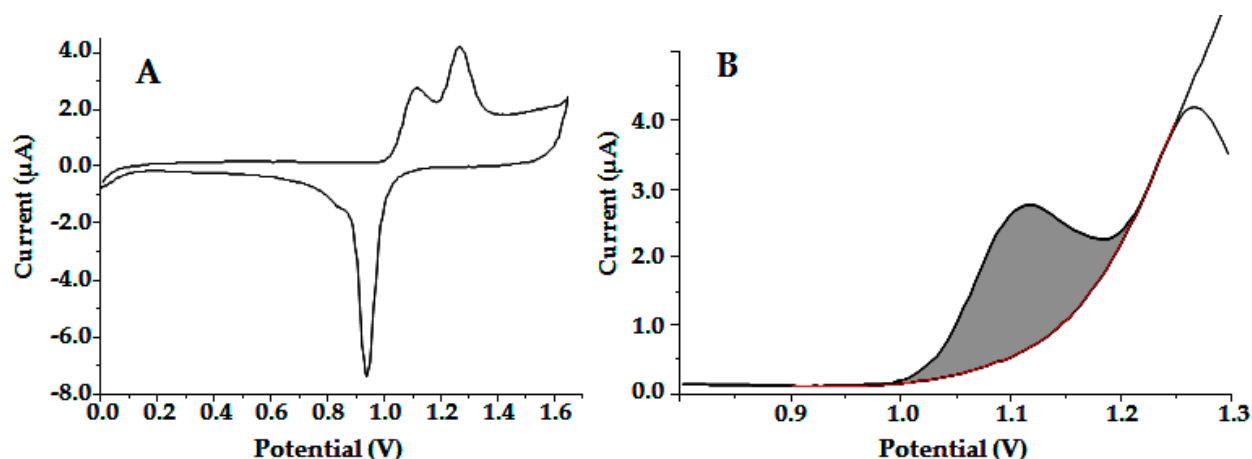

**Figure S2.** Cyclic voltammogram of the bare gold electrode (A). The electrochemical cleaning was performed for 20 cycles between 0 to +1.65 V relative to the Ag/AgCl electrode in 0.50 M H<sub>2</sub>SO<sub>4</sub>. For integrating the area under the curve, it was used the enlargement shown in (B).

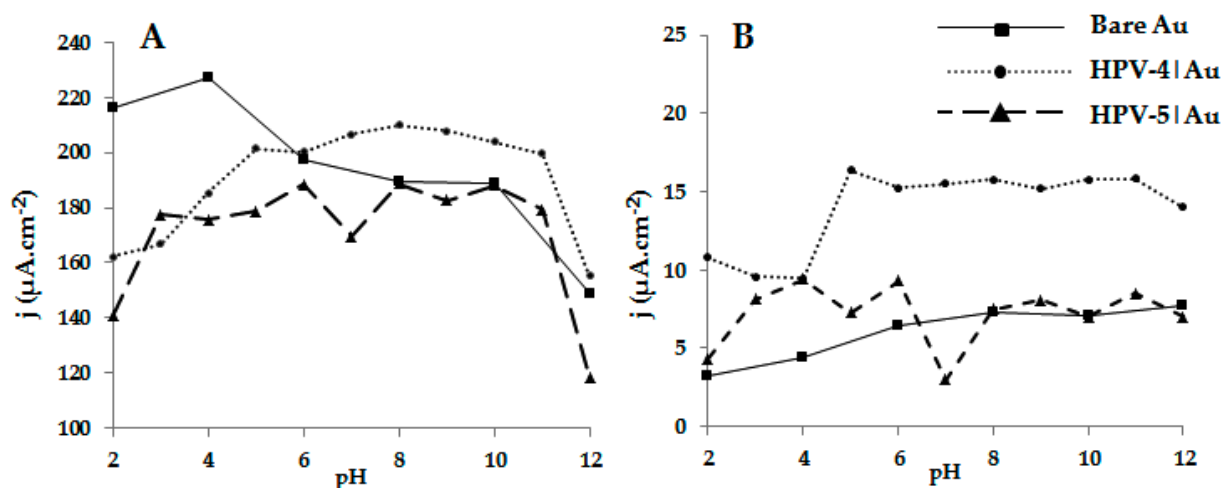

**Figure S3.** Effect of pH on current density. Measurement were performed at RT using the HPV-4|Au (black circles), HPV-5|Au (black triangles) and bare Au (black square) electrodes. Ru(NH<sub>3</sub>)<sub>6</sub><sup>3+</sup> (A) and Ferrocene (B) were used as probe molecules.

### Calculation of Surface Roughness

Areas were estimated using the Randles–Sevcik equation:  $i_p = 2.69 \times 10^5 n^{3/2} D A^{1/2} C v^{1/2}$ . Where  $i_p$  is the peak current,  $n$  corresponds to the number of electrons involve in the reaction,  $C$  is the concentration of redox probe in bulk,  $D$  is the diffusion coefficient of redox probe,  $v^{1/2}$  is the square root of potential scan rate and  $A$  is the electroactive area ( $A_{act}$ ). The calculation was estimated in a scan rate range between 10 and 100 mV/s. For real area ( $A_{real}$ ) determination was used the following equation:  $A_{real} = Q_{AuO}(\mu C)/200(\mu C/cm^2)$  the charge associated to develop of a one AuO monolayer when the electrode is oxidized at potentials >0.9 V in sulfuric acid corresponds to 200  $\mu C/cm^2$ . For this reason, it is possible to determine the  $A_{real}$ , integrating the area under the curve (Figure S2B) for the formation of the first gold oxide. Surface roughness was calculated as  $A_{real}/A_{act}$ .

## Analytical Methods

### *Reverse Phase HPLC.*

RP-HPLC analysis was performed on an Agilent 1200 liquid chromatograph (Omaha, Nebraska, USA) with UV-Vis detector (210 nm). For data presented in Figure 2 C-D and Figure 1S, a Merck Chromolith® C18 (50 × 4.6 mm) column was used with a linear gradient applied from 5% to 70% Solvent B (0.05% TFA in ACN) in Solvent A (0.05% TFA in water) for 11.5 min at a flow rate of 2.0 mL/min at room temperature. For data presented in Figure 1 and Figure 2 A,B an Eclipse XDB-C18 column (3.5 µm; 4.6 × 150 mm) was used, using a linear gradient from 5 to 70% Solvent B in Solvent A, and gradient time was 45 min, a flow rate of 1.0 mL/min. In all analysis, 10 µL of sample solution (1 mg/mL), were used.

### *Peptide Purification.*

Molecules were purified using solid-phase extraction columns (SUPELCO LC-18 with 2.0 g resin). SPE columns were activated prior to use with methanol and acetonitrile (containing 0.1% TFA) and equilibrated with water (containing 0.1%TFA). Crude peptides (40mg) were passed through the column, and a gradient was used for their elution. Collected fractions were analyzed using RP-HPLC (as describe above). Fractions that contained pure products were lyophilized.

### *MALDI-TOF MS.*

This analysis was performed on an Ultraflex III TOF-TOF mass spectrometer (Bruker Daltonics, Bremen, Germany) in reflectron mode. 2 µL of peptide solution (1 mg/mL) was mixed with 18 µL of matrix solution (10 mg/mL), and then the mixture (1 µL) was seeded in an MTP384 polished steel target (BrukerDaltonics) and dried. 2,5-dihydroxybenzoic acid or sinapinic acid was used as a matrix, with laser: 500 shots and 25–30% power.
